# Supplementary material
Source: publisher site journal article supplement (https://www.dovepress.com/article/432699)
Supplement: Supplementary file 1 [file get_supplementary_file.php]

Supplementary Table 1, The usage of ACEI/ARB drugs in patients with DKD/DM

|  | Non-DKD | DKD | P | Non-DM | DM | P |
| --- | --- | --- | --- | --- | --- | --- |
| ARB | 192(52.6%) | 213(75.3%) | <0.001 | 377(48.8%) | 405(62.5%) | <0.001 |
| ACEI | 63(17.3%) | 57(20.1%) | 0.349 | 104(13.5%) | 120(18.5%) | 0.009 |
